# Supplementary material
Source: Elsevier journal article supplement (https://eprints.soton.ac.uk/376708/3/mmc1.xls)
Supplement: mmc1 [file mmc1.xls]

## Sheet: read_me
Brown, S. and Nicholls, R.J. Subsidence and human influences in mega deltas: The case of the Ganges-Brahmaputra-Meghna.
Submitted to Science of the Total Environment, January 2015. Revised April 2015.
http://dx.doi.org/10.1016/j.scitotenv.2015.04.124
Supplementary Material: Subsidence measurements in the Ganges-Brahmaputra-Meghna.
This file contains the complete data, methodologies and age of meausurement for subsidence records in the Ganges-Brahmaputra-Meghna basin obtained through a literature review. A negative value indicates land uplift.
Where multiple authors cite the same paper, the primary source is only reported once.
For mapping purposes, errors from original papers have been corrected for (e.g. when expressing latitude and longitude in decimal degrees).
NOTES:
Due to the nature and collection of the data, it was not always possible to find data from the original source. Hence a score system was used, as shown in column 2.
*	Unable to find original data source to verify reported subsidence rate.
**	Have not read original material, as new citing paper uses material for new calculations.
***	Have read original material, but unclear where this value was quoted from.
****	Have read original material, citation is clear and correct, but the citation has additional assumptions made, or an assumed average rate reported.
*****	Have read original material, citation is clear and correctly reported.
Exact locations of latitude and longitude were also not able to be found, so a score system is also used to indicate confidence in the data location, as shown in column 7.
1	Precise latitude/longitude or place name given in text.
2	Named place, such as a village, a specific part of a city that is identified on a map.
3	Named place, such as a town or large part of a city.
4	Named place, such as a large city or a district.
5	Broad area specified
REFERENCES (IN SUPPLEMENTARY MATERIAL ONLY):
Alam, M., 1988. Geology of Modhupur Tract and its adjoining areas in Bangladesh. Records of Geological Survey of Bangladesh, 5(3), 1-18.
Alam, M., 1996. Subsidence of the Ganges-Brahmaputra delta of Bangladesh and associated drainage, sedimentation and salinity problems. In: J.D. Milliman and B.U. Haq (Eds.), Sea-level rise and coastal subsidence. Kluwer Academic Publishers, Dordrecht, pp. 169-192.
Allison, M.A., Khan, S.R., Goodbred Jr, S.L. and Kuehl, S.A., 2003. Stratigraphic evolution of the late Holocene Ganges–Brahmaputra lower delta plain. Sedimentary Geology, 155(3–4), 317-342. doi: 10.1016/S0037-0738(02)00185-9
Bhattacharya, A.K., Basak, S. and Patra, M.N., 2004. Land subsidence in Calcutta under the effect of hydrogeological conditions and over-extraction of groundwater. EJGE, 91-16.
Brammer, H., 2014. Bangladesh’s dynamic coastal regions and sea-level rise. Climate Risk Management, 1, 51-62. doi: 10.1016/j.crm.2013.10.001
Brammer, H., 1971. Coatings in seasonally flooded soils. Geoderma, 6(1), 5-16. doi: 10.1016/0016-7061(71)90047-4
Brammer, H., 1971a. Soil survey project. Bangladesh, soil resources, Food and Agriculture Organisation, Rome.
Chatterjee, R.S. Fruneau, B., Rudant, J.P., Roy, P.S., Frison, P.-L., Lakhera, R.C., Dadhwal, V.K. and Saha, R., 2006. Subsidence of Kolkata (Calcutta) City, India during the 1990s as observed from space by Differential Synthetic Aperture Radar Interferometry (D-InSAR) technqiue. Remote Sensing of Environment, 102, 176-185.
Chatterjee, R.S. Roy, P.S., Dadhwal, V.K., Lakhera, R.C., T.X. Quang and Saha, R., 2007. Assessment of land subsidence phenonmenon in Kolkata city, India using satellite-based D-InSAR technique. Current Science, 93(1), 85-90.
Col Burrand, 1933. As cited in Warrick et al. (1996), but not cited in reference list.
Curtis, S.J., 1933. Working plan for the forests of the Sundarbans division: Calcutta, Bengal. Volume 1. Parts I and II. Government Press, Calcutta.
East, E.H., 1818. Abstract of an account, containing the particulars of a boring made near the river Hooghly, in the vicinity of Calcutta, from May to July 1814 inclusive in search of a spring of pure water, Asiatik Researches or Transactions of the Society Instituted in Bengal for the Inquring into History and Antiquities, the Arts, Science and Literature of Asia. Volume 12. John Murray, London,…
Ganguli, M., 2011. Groundwater withdrawal and land subsidence: A study of Singur Block, West Bengal, India. International Journal of Geomatics and Geosciences, 2(2), 465-471.
Goodbred, S.L. and Kuehl, S.A., 2000a. The significance of large sediment supply, active tectonism, and eustasy on margin sequence development: Late Quaternary stratigraphy and evolution of the Ganges-Brahmaputra delta. Sedimentary Geology, 133, 227-248. doi: 10.1016/S0037-0738(00)00041-5
Hanebuth, T.J.J., Kudrass, H.R., Linstaedter, J., Islam, B. and Zander, A.M., 2013. Rapid coastal subsidence in the central Ganges-Brahmaputra Delta (Bangladesh) since the 17th century deduced from submerged salt-producing kilns. Geology, 41(9), 987-990. doi: 10.1130/G34646.1
Hazra, S., Ghosh, T., Bankshi, A. and Ray, N., 2001. Sea level change: its impact on West Bengal coast. Indian Journal of Geography and Environment, 6, 25-37.
Higgins, S.A. Overeem, I., Steckler, M.S., Syvitski, J.P M., Seeber, L. and Akhter, S.H., 2014. InSAR measurements of compaction and subsidence in the Ganges-Brahmaputra Delta, Bangladesh. Journal of Geophysical Research: Earth Surface, 119(8), 2014JF003117. doi: 10.1002/2014JF003117
Hoque, M., 1982. Tectonic set up of Bangladesh and its relation to hydrocarbon accumulation - Phase 1. Centre for Policy Research and Universities Field Staff International.
Hoque, M. and Alam, M., 1997. Subsidence in the lower delatic areas of Bangladesh. Marine Geodesy, 20(1), 105-120. doi: 10.1080/01490419709388098
Hoque, M., Salahuddin, M.M., Asaduzzaman, A.T.M., Chowdhury, S.Q., Nasreen, N. and Fazlul Haq, A.T.M., 1994. Neotectonic activity in the metropolis Dhaka, the capital of Bangladesh. Dhaka University Journal of Science, 42(2), 211-219.
Hunter, W.W., 1875. A statistical account of Bengal. Volume 1. Trubner and Co., London, pp. 22-34, pp. 285-289.
Islam, M.R., Begum, S.F., Yamaguchi, Y. and Ogawa, K., 1999. The Ganges and Brahmaputra rivers in Bangladesh: basin denudation and sedimentation. Hydrological Processes, 13(17), 2907-2923. doi: 10.1002/(SICI)1099-1085
Johnson, S.Y. and Alam, A.M.N., 1991. Sedimentation and tectonics of the Sylhet trough, Bangladesh. Geological Society of America Bulletin, 103(11), 1513-1527. doi: 10.1130/0016-7606
Khan, S.R. and Islam, M.B., 2008. Holocene stratigraphy of the lower Ganges-Brahmaputra river delta in Bangladesh. Frontiers of Earth Science in China, 2(4), 393-399. doi: 10.1007/s11707-008-0051-8
Khan, S.R. and Kudrass, H.R., 1999. Holocene sedimentation of the lower Ganges-Brahmaputra river delta, Bangladesh. SONNE-SO126 cruise Final Report, Federal Institute for Geosciences and Natural Resources, Hanover, Germany.
Master Plan Organisation, 1985. Master Plan report. Phase 1. Master Plan Organisation, Dhaka.
Master Plan Organisation, 1986. National Water Plan. Dhaka: Ministry of Irrigation, Water Development and Flood Control, Government of Bangladesh, Bangladesh.
Monsur, M.H., 1990. Stratigraphical and palaeomagnetical studies of some Quaternary deposits of the Bengal Basin, Bangladesh. PhD thesis, Vrike University, Brussels, Belgium.
Morgan, J.P. and McIntire, W.G., 1959. Quaternary geology of the Bengal Basin: East Pakistan and India. Bulletin of the Geological Society of America, 70, 319-342. doi: 10.1130/0016-7606
Pethick, J. and Orford, J.D., 2013. Rapid rise in effective sea-level in southwest Bangladesh: Its causes and contemporary rates. Global and Planetary Change, 111, 237-245. doi: 10.1016/j.gloplacha.2013.09.019.
Sahu, P. and Sikdar, P.K., 2011. Threat of land subsidence in and around Kolkata City and East Kolkata Wetlands, West Bengal, India. Journal Earth System Science, 120(3), 435-446.
Sarker, M.H., Choudhury, G.A., Akter, J. and Hore, S.K., 2012. Bengal delta not sinking at a very high rate, Daily Star. 23rd December 2012.Sarker, M. H., Choudhury, G. A., Akter, J., and Hore, S. K.: Bengal delta not sinking at a very high rate. In: Daily Star, 2012.
Sikdar, P.K., Biswas, A.B. and Saha, A.K., 1996. A study on the possible land subsidence in Calcutta and Howrah cities due to groundwater overdraft. Indian Journal of Geology, 68(3), 193-200.
Smith, R.B., 1841. On the structure of the delta of the Ganges as exhibited by the boring operations in Fort Williams, A. D. 1836-40. Calcutta Journal of Natural History, 1, 324-343.
Stanley, D.J. and Hait, A.K., 2000. Holocene depositional patterns, neotectonics and sundarban mangroves in the western Ganges-Brahmaputra delta. Journal of Coastal Research, 16(1), 26-39.
Steckler, M., Akhter, S.H., Seeber, L. and Armbruster, J., 2008b. GPS in Bangladesh: Delta subsidence, monsoonal loading and continental collision. www.unavco.org/pubs_reports/.../UNV-GRID-SPREAD-TP_41.pdf Accessed September 2014.
Steckler, M.S., 2013. GPS velocity field in Bangladesh: Delta subsidence, seasonal water loading and shortening across the Burma Accretionary Prism. Poster presentation. Abstract T13D-2566, 2013 Fall Meeting of the AGU, San Francisco, California.
Steckler, M.S. Nooner, S.L., Akhter, S.H., Chowdhury, S.K., Bettadpur, S., Seeber, L. and Kogan, M.G., 2010. Modeling Earth deformation from monsoonal flooding in Bangladesh using hydrographic, GPS, and Gravity Recovery and Climate Experiment (GRACE) data. Journal of Geophysical Research-Solid Earth, 115, B08407. doi: 10.1029/2009JB007018
Syvitski, J.P.M., Kettner, A.J., Overeem, I., Hutton E.W.H., Hannon, M.T., Brakenridge, R.G., Day, J., Vӧrӧsmarty, C., Saito, Y., Giosam, L. and Nicholls, R.J., 2009. Sinking deltas due to human activities. Nature Geoscience, 2(10), 681-686. doi:10.1038/ngeo629
Umitsu, M., 1987. Late Quaternary sediment environments and landform evolution in the Bengal Lowland. Geographical Review of Japan Series B, 60, 164-178.
Umitsu, M., 1993. Late Quaternary sedimentary environments and landforms in the Ganges Delta. Sedimentary Geology, 83, 177-186.
Umitsu, M., 1985. Natural levees and landform evolution in the Bengal lowland. Geographical Review of Japan, 58(2), 149-164.
Vishnu-Mittre and Guputa, H.P., 1970. Pollen analytical study of Quaternary deposits in the Bengal Basin. Paleobotanist, 19, 297–306.
Warrick, R.A., Azizul Hoq Bhuiya, A.K., Mitchell, W.M., Murty, T.S. and Rasheed, K.B.S., 1996. Sea-level changes in the Bay of Bengal. In: R.A. Warrick and Q.K. Ahmad (Eds.), The implications of climate and sea-level change for Bangladesh. Kluwer Academic Publishers, Dordrecht, pp. 97-142.
WASA, 1991. Dhaka regional groundwater and subsidence model, Dhaka Water and Sewerage Authority, Dhaka, Bangladesh.
Worm, H.-U., Ahmed, A.M.M., Ahmed, N.U., Islam, H.O., Huq, H.H., Hambach, U. and Lietz, J., 1998. Large sedimentation rate in the Bengal delta: Magnetostratigraphic dating of Cenozoic sediments from northeastern Bangladesh. Geology, 26, 487-490. doi: 10.1130/0091-7613
REFERENCES (ADDITIONAL REFERENCE IN MAIN TEXT WHICH REFER TO THE WHOLE DELTA OR A BROAD REGION):
Ericson, J.P., Vörösmarty, C.J., Dingman, S.L., Ward, L.G. and Meybeck, M., 2006. Effective sea-level rise and deltas: Causes of change and human dimension implications. Global and Planetary Change, 50, 63-82. doi: 10.1016/j.gloplacha.2005.07.004
Higgins, S.A. Overeem, I., Steckler, M.S., Syvitski, J.P M., Seeber, L. and Akhter, S.H., 2014. InSAR measurements of compaction and subsidence in the Ganges-Brahmaputra Delta, Bangladesh. Journal of Geophysical Research: Earth Surface, 119(8), 2014JF003117. doi: 10.1002/2014JF003117
Hübscher, C. and Spieß, V., 2005. Forced regression systems tracts on the Bengal Shelf. Marine Geology, 219(4), 207-218. doi: 10.1016/j.margeo.2005.06.037
Khan, S.R. and Islam, M.B., 2008. Holocene stratigraphy of the lower Ganges-Brahmaputra river delta in Bangladesh. Frontiers of Earth Science in China, 2(4), 393-399. doi: 10.1007/s11707-008-0051-8
Ostanciaux, É., Husson, L., Choblet, G., Robin, C. and Pedoja, K., 2012. Present-day trends of vertical ground motions along the coast lines. Earth-Science Reviews, 110, 74-92. doi: 10.1016/j.earscirev.2011.10.004
Schiermeier, Q., 2014. Floods: Holding back the tide. Nature, 508(7495), 164-6. doi: 10.1038/508164a

## Sheet: brown&nicholls_subsidence_rates
Key reference	Other reference cited (more stars indicate a greater certainty of correct reference)	Dominant land use (after GlobCover, 2009)	Location	Latitude (refers to point or area)	Longitude (refers to point or area)	Confidence of lat/long on figure (1 (known lat/long) to 5 (region))	Subsidence (mm/yr)	Measurement method (generic)	Assumed or quantified age (years BP) or duration (with time period in parenthesis)	Geological era
Alam (1996)	Morgan and McIntire (1959)***	Dominant rainfed croplands, mosaic vegetation, mosaic croplands	Sundarbans	22.091	88.551	5	2	No information, not defined or clear	No information, not defined or clear	No information, not defined or clear
Alam (1996)		Dominant rainfed croplands, mosaic vegetation, mosaic croplands	Hatiya Trough	22.64	91.42	5	22	Borings / well / auger	No information, not defined or clear	No information, not defined or clear
Alam (1996)		Urban - Dhaka	Dhaka (north-west)	23.76	90.37	4	22	Borings / well / auger	No information, not defined or clear	Holocene
Alam (1996)		Dominant irrigated croplands	Sylhet Trough (hinge)	24.39	91.424	5	30	No information, not defined or clear	No information, not defined or clear	No information, not defined or clear
Alam (1996)		Dominant irrigated croplands	Hazipur	24.746	91.856	3	22	Borings / well / auger	10000	Holocene
Alam (1996); Hoque and Alam (1997)	Morgan and McIntire (1959)***	Urban - Kolkata	Kolkata	22.572	88.363	4	1	No information, not defined or clear	No information, not defined or clear	No information, not defined or clear
Alam (1996); Hoque and Alam (1997)	Morgan and McIntire (1959)***	Urban - Kolkata	Kolkata	22.572	88.363	4	2	No information, not defined or clear	No information, not defined or clear	No information, not defined or clear
Alam (1996); Hoque and Alam (1997)	Morgan and McIntire (1959)****	Urban - Khulna	Khulna	22.819	89.557	4	1	No information, not defined or clear	5000	Holocene
Alam (1996); Hoque and Alam (1997)	Morgan and McIntire (1959)****	Urban - Khulna	Khulna	22.819	89.557	4	2	No information, not defined or clear	5000	Holocene
Alam (1996); Hoque and Alam (1997)	Morgan and McIntire (1959)****	Sundarbans	Sundarbans	22.1731	89.4182	5	1	Borings / well / auger	5000	Holocene
Alam (1996); Hoque and Alam (1997)	Morgan and McIntire (1959)****	Sundarbans	Sundarbans	22.1731	89.4182	5	2	Borings / well / auger	5000	Holocene
Alam (1996); Hoque and Alam (1997)		Dominant rainfed croplands, mosaic vegetation, mosaic croplands	Hatiya Trough	22.64	91.42	5	30	No information, not defined or clear	No information, not defined or clear	No information, not defined or clear
Alam (1996); Hoque and Alam (1997)	Hoque (1982*); Hoque et al. (1994*)	Dominant irrigated croplands	Dhaka Depression	23.238	90.546	5	1.88	No information, not defined or clear	No information, not defined or clear	No information, not defined or clear
Alam (1996); Hoque and Alam (1997)	Brammer (1971a)*; Alam (1988)*; Monsur (1990)*; WASA (1991)*	Urban - Dhaka	Dhaka City	23.707	90.406	4	0.65	Carbon dating	No information, not defined or clear	No information, not defined or clear
Alam (1996); Hoque and Alam (1997)	Brammer (1971a)*; Alam (1988)*; Monsur (1990)* and WASA (1991)*	Urban - Dhaka	Dholai Khal	23.712	90.392	3	0.75	Carbon dating	No information, not defined or clear	No information, not defined or clear
Alam (1996); Hoque and Alam (1997)	Brammer (1971a)*; Alam (1988)*; Monsur (1990)* and WASA (1991)*	Urban - Dhaka	Kalibari pond	23.739	90.443	3	0.75	Carbon dating	No information, not defined or clear	No information, not defined or clear
Alam (1996); Hoque and Alam (1997)	Brammer (1971a)*; Alam (1988)*; Monsur (1990)* and WASA (1991)*	Urban - Dhaka	Dakhingoan	23.742	90.448	3	0.52	Carbon dating	No information, not defined or clear	No information, not defined or clear
Alam (1996); Hoque and Alam (1997)	Brammer (1971a)*; Alam (1988)*; Monsur (1990)* and WASA (1991)*	Urban - Dhaka	Rampura	23.761	90.42	3	0.43	Carbon dating	No information, not defined or clear	No information, not defined or clear
Alam (1996); Hoque and Alam (1997)	Brammer (1971a)*; Alam (1988)*; Monsur (1990)* and WASA (1991)*	Urban - Dhaka	Gulshan	23.791	90.415	3	0.57	Carbon dating	No information, not defined or clear	No information, not defined or clear
Alam (1996); Hoque and Alam (1997)	Brammer (1971a)*; Alam (1988)*; Monsur (1990)* and WASA (1991)*	Urban - Dhaka	Mirpur	23.792	90.361	3	0.96	Carbon dating	No information, not defined or clear	No information, not defined or clear
Alam (1996); Hoque and Alam (1997); Warrick et al. (1996)	MPO (1985*, 1986*) cites Morgan and McIntire**** (1959)	Dominant irrigated croplands	Surma Basin	24.746	91.856	5	5.5	No information, not defined or clear	No information, not defined or clear	Holocene
Alam (1996); Hoque and Alam (1997); Warrick et al. (1996)	MPO (1985*, 1986*) cites Morgan and McIntire**** (1959)	Dominant irrigated croplands	Surma Basin	24.746	91.856	5	0.6	No information, not defined or clear	No information, not defined or clear	Holocene
Alam (1996); Hoque and Alam (1997); Warrick et al. (1996)	MPO (1985*, 1986*) cites Morgan and McIntire**** (1959)	Dominant irrigated croplands	Sylhet Tough (Surma Basin)	24.746	91.856	5	20	No information, not defined or clear	No information, not defined or clear	Holocene
Allison et al. (2003)		Sundarbans	Sub delta	21.993	89.536	5	1	No information, not defined or clear	No information, not defined or clear	No information, not defined or clear
Allison et al. (2003)		Sundarbans	Sub delta	21.993	89.536	5	4	No information, not defined or clear	No information, not defined or clear	No information, not defined or clear
Bhattacharya et al. (2004)	Various**	Urban - Kolkata	Dover Lane, Kolkata	22.5226	88.3618	1	11.56	Groundwater levels	42 (1958-2000)	Recent
Bhattacharya et al. (2004)	Various**	Urban - Kolkata	Science City, Kolkata	22.5397	88.3962	1	13	Groundwater levels	44 (1956-2000)	Recent
Bhattacharya et al. (2004)	Various**	Urban - Kolkata	Hatirsur-Kasba area, Kolkata	22.4918	88.3919	2	9.21	Groundwater levels	42 (1958-2000?)	Recent
Bhattacharya et al. (2004)	Various**	Urban - Kolkata	Garia area, Kolkata	22.4629	88.3967	2	7.39	Groundwater levels	42 (1958-2000?)	Recent
Bhattacharya et al. (2004)	Various**	Dominant rainfed croplands, mosaic vegetation, mosaic croplands	Sonarpur Railway Station, Kolkata	22.4424	88.4309	1	11.25	Groundwater levels	42 (1958-2000?)	Recent
Bhattacharya et al. (2004)	Various**	Urban - Kolkata	Garfa area, Kolkata	22.4918	88.3919	2	6.52	Groundwater levels	42 (1958-2000?)	Recent
Bhattacharya et al. (2004)	Various**	Dominant rainfed croplands, mosaic vegetation, mosaic croplands	Salt Lake, Kolkata	22.5667	88.4667	2	20.46	Groundwater levels	44 (1956-2000)	Recent
Bhattacharya et al. (2004)	Various**	Urban - Kolkata	Bagha Jatin, Kolkata	22.4835	88.3872	1	8.05	Groundwater levels	42 (1958-2000?)	Recent
Brammer (2014)	Allison et al. (2003)****	Dominant irrigated croplands	6BP48 (6BP98)	21.8069	90.1367	1	2.4	Carbon dating	614±14	Recent
Brammer (2014)	Allison et al. (2003)****	Sundarbans	Sundarbans (19BS98)	22.1294	89.7156	1	1.9	Carbon dating	730±50	Recent
Brammer (2014)	Allison et al. (2003)****	Sundarbans	Sundarbans (7BS99)	21.8183	89.4603	1	3.1	Carbon dating	227±48	Recent
Brammer (2014)	Allison et al. (2003)****	Sundarbans	Sundarbans (7BS99)	21.8183	89.4603	1	7.1	Carbon dating	309±8	Recent
Brammer (2014)	Allison et al. (2003)****	Sundarbans	Sundarbans (12BS99)	22.0819	89.225	1	2.6	Carbon dating	584±64	Recent
Brammer (2014)	Allison et al. (2003)**** cites Brammer (1971b)***	Dominant irrigated croplands	BV316 (BVC16)	22.55	90.0333	1	1.3	Carbon dating	820±111	Recent
Brammer (2014)	Allison et al. (2003)****	Sundarbans	Sundarbans (12BS99)	22.0819	89.225	1	1.3	Carbon dating	2378±29	Holocene
Brammer (2014)	Allison et al. (2003)****	Sundarbans	Sundarbans (12BS99)	22.0819	89.225	1	1.8	Carbon dating	3192±17	Holocene
Chatterjee et al. (2006; 2007)		Urban - Kolkata	Kolkata (Machhua Bazaar)	22.5799	88.3709	1	4.7	InSAR	6 (1992-1998)	Recent
Chatterjee et al. (2006; 2007)		Urban - Kolkata	Kolkata (Kolkata University)	22.5849	88.3751	1	6.5	InSAR	3 (1993-1996)	Recent
Ganguli (2011)	Various**	Dominant rainfed croplands, mosaic vegetation, mosaic croplands	Singur Block	22.81	88.23	4	0.92	Groundwater levels	4 (1998-2002)	Recent
Ganguli (2011)	Various**	Dominant rainfed croplands, mosaic vegetation, mosaic croplands	Singur Block	22.81	88.23	4	8.7	Groundwater levels	4 (2002-2006)	Recent
Goodbred and Kuehl (2000a); Goodbred (pers.comm.)		Dominant rainfed croplands, mosaic vegetation, mosaic croplands	Central coastal plain (BH-1)	22.6333	89.7833	1	2	Neotectonics, carbon dating	7703, 9219, 8374	Holocene
Goodbred and Kuehl (2000a); Goodbred (pers.comm.)		Dominant rainfed croplands, mosaic vegetation, mosaic croplands	Central coastal plain (BH-1)	22.6333	89.7833	1	4	Neotectonics, carbon dating	7703, 9219, 8374	Holocene
Goodbred and Kuehl (2000a); Goodbred (pers.comm.)		Dominant irrigated croplands	Sylet Basin (BH-8)	24.5358	91.2181	1	4	Neotectonics, carbon dating	6506, 7212, 10367	Holocene
Goodbred and Kuehl (2000a); Goodbred (pers.comm.)		Dominant irrigated croplands	Sylet Basin (BH-8)	24.5358	91.2181	1	2	Neotectonics, carbon dating	6506, 7212, 10367	Holocene
Goodbred and Kuehl (2000a); Goodbred (pers.comm.)		Dominant irrigated croplands	Sylet Basin (BH-9)	24.9344	91.4006	1	4	Neotectonics, carbon dating	6289, 6378, 10042	Holocene
Goodbred and Kuehl (2000a); Goodbred (pers.comm.)		Dominant irrigated croplands	Sylet Basin (BH-9)	24.9344	91.4006	1	2	Neotectonics, carbon dating	6289, 6378, 10042	Holocene
Hanebuth et al. (2013)		Sundarbans	Gawonia/Katya	21.8575	89.7667	1	3	Carbon dating (with optical stimulated luminescene)	308±35	Recent
Hanebuth et al. (2013)		Sundarbans	Gawonia/Katya	21.8575	89.7667	1	5.2	Carbon dating (with optical stimulated luminescene)	308±35	Recent
Hanebuth et al. (2013)		Sundarbans	Gawonia/Katya	21.8575	89.7667	1	5.7	Carbon dating (with optical stimulated luminescene)	363	Recent
Hazra et al. (2001)		Dominant rainfed croplands, mosaic vegetation, mosaic croplands	Sager Island	21.75	88.117	4	2.6	No information, not defined or clear	No information, not defined or clear	No information, not defined or clear
Higgins et al. (2014)	Steckler et al. (2013)*****	Dominant irrigated croplands	Raipur	23.0365	90.7632	1	3.5	GPS	8 (2003-2011)	Recent
Higgins et al. (2014)	Steckler et al. (2013)*****	Dominant irrigated croplands	Raipur	23.0365	90.7632	1	6.1	GPS	4 (2007-2011)	Recent
Higgins et al. (2014)	Steckler et al. (2013)*****	Urban - Dhaka	Dhaka	23.7267	90.4013	1	12.3	GPS	9 (2003-2012)	Recent
Higgins et al. (2014)	Steckler et al. (2013)*****	Urban - Dhaka	Dhaka	23.7267	90.4013	1	15.7	GPS	4 (2007-2011)	Recent
Hoque and Alam (1997)	Hoque (1982)* cites Morgan and McIntire (1959)**** cites Hunter (1875)***	Dominant rainfed croplands, mosaic vegetation, mosaic croplands	Kolkata Port Canning on Malta River	22.314	88.671	3	0.61	Tank excavation	No information, not defined or clear	No information, not defined or clear
Hoque and Alam (1997)	Hoque (1982)* cites Morgan and McIntire (1959)**** cites East (1818)*****	Urban - Kolkata	Kolkata and Vicinity (Chowringee Road)	22.539	88.346	2	2.13	Tank excavation	5000	Holocene
Hoque and Alam (1997)	Hoque (1982)* cites Morgan and McIntire (1959)**** cites Hunter (1875)***	Urban - Kolkata	Kolkata and Vicinity (Saldah)	22.568	88.372	3	1.82	Tank excavation	5000	Holocene
Hoque and Alam (1997)	Umitsu (1993)***** cites Vishu-Mittre and Gupta (1970)*****	Dominant rainfed croplands, mosaic vegetation, mosaic croplands	Sankrail	22.57	88.24	3	0.309	Carbon dating	4925±309	Holocene
Hoque and Alam (1997)	Umitsu (1993)***** cites Vishu-Mittre and Gupta (1970)*****	Dominant rainfed croplands, mosaic vegetation, mosaic croplands	Sankrail	22.57	88.24	3	0.447	Carbon dating	4075±100	Holocene
Hoque and Alam (1997)	Umitsu (1993)***** cites Vishu-Mittre and Gupta (1970)*****	Dominant rainfed croplands, mosaic vegetation, mosaic croplands	Sankrail	22.57	88.24	3	0.523	Carbon dating	2615±100	Holocene
Hoque and Alam (1997)	Umitsu (1993)***** cites Vishu-Mittre and Gupta (1970)*****	Dominant rainfed croplands, mosaic vegetation, mosaic croplands	Sankrail	22.57	88.24	3	0.644	Carbon dating	4720±135	Holocene
Hoque and Alam (1997)	Umitsu (1993)***** cites Vishu-Mittre and Gupta (1970)*****	Dominant rainfed croplands, mosaic vegetation, mosaic croplands	Sankrail	22.57	88.24	3	0.895	Carbon dating	5440±115	Holocene
Hoque and Alam (1997)	Umitsu (1993)***** cites Vishu-Mittre and Gupta (1970)*****	Dominant rainfed croplands, mosaic vegetation, mosaic croplands	Sankrail	22.57	88.24	3	1.076	Carbon dating	5810±120	Holocene
Hoque and Alam (1997)	Hoque (1992)* cites Morgan and McIntire (1959)**** cites Curtis (1933)*	Urban - Kolkata	Kolkata and Vicinity (King George Dock)	22.572	88.363	3	2.42	Tank excavation	5000	Holocene
Hoque and Alam (1997)	Umitsu (1993)***** cites Vishu-Mittre and Gupta (1970)*****	Urban - Kolkata	Kolkata	22.572	88.363	4	0.5	No information, not defined or clear	No information, not defined or clear	Holocene
Hoque and Alam (1997)	Umitsu (1993)***** cites Vishu-Mittre and Gupta (1970)*****	Urban - Kolkata	Kolkata	22.572	88.363	4	1	No information, not defined or clear	No information, not defined or clear	Holocene
Hoque and Alam (1997)	Hoque (1982)* cites Morgan and McIntire (1959)**** cites Smith (1841)*****	Urban - Kolkata	Kolkata and Vicinity (Port William)	22.572	88.363	3	1.82	Borings / well / auger	5000	Holocene
Hoque and Alam (1997)	Hoque (1982)* cites Morgan and McIntire (1959)**** cites East (1818)*****	Urban - Kolkata	Kolkata and Vicinity (Near Hoogly River)	22.572	88.363	3	1.95	Borings / well / auger	5000	Holocene
Hoque and Alam (1997)	Hoque (1982)* cites Morgan and McIntire (1959)**** cites Smith (1841)*****	Urban - Kolkata	Kolkata and Vicinity (Port Willaim)	22.572	88.363	3	3.04	Borings / well / auger	5000	Holocene
Hoque and Alam (1997)	Hoque (1982)* cites Morgan and McIntire (1959)**** cites East (1818)*****	Urban - Kolkata	Kolkata and Vicinity (Near Hoogly River)	22.572	88.363	3	3.35	Borings / well / auger	5000	Holocene
Hoque and Alam (1997)	Hoque (1982)* cites Morgan and McIntire (1959)****	Sundarbans	Sundarbans (Dubla Island)	21.744	89.567	3	1.21	Borings / well / auger	5000	Holocene
Hoque and Alam (1997)	Hoque (1982)* cites Morgan and McIntire (1959)****	Sundarbans	Sundarbans (Raimangal River mouth)	21.783	89.14	3	1.21	Borings / well / auger	5000	Holocene
Hoque and Alam (1997)	Hoque (1982)* cites Morgan and McIntire (1959)****	Sundarbans	Sundarbans (Talpatti Khal)	21.792	89.283	3	0.85	Borings / well / auger	5000	Holocene
Hoque and Alam (1997)	Hoque (1982)* cites Morgan and McIntire (1959)****	Sundarbans	Sundarbans (Dhaki Khal)	21.9	89.2	3	0.79	Tank excavation	5000	Holocene
Hoque and Alam (1997)	Hoque (1982)* cites Morgan and McIntire (1959)****	Sundarbans	Sundarbans (Dhaki Khal)	21.9	89.2	3	1.28	Tank excavation	5000	Holocene
Hoque and Alam (1997)	Hoque (1982)* cites Morgan and McIntire (1959)****	Sundarbans	Sundarbans (Dhaki Khal)	21.9	89.2	3	1.34	Tank excavation	5000	Holocene
Hoque and Alam (1997)	Hoque (1982)* cites Morgan and McIntire (1959)****	Sundarbans	Sundarbans (Dhaki Khal)	21.9	89.2	3	0.97	Borings / well / auger	5000	Holocene
Hoque and Alam (1997)	Hoque (1982)* cites Morgan and McIntire (1959)****	Sundarbans	Sundarbans (Kabodak Forest)	21.93	89.283	3	0.74	Borings / well / auger	5000	Holocene
Hoque and Alam (1997)	Hoque (1982)* cites Morgan and McIntire (1959)****	Sundarbans	Sundarbans (Kabodak Forest)	21.93	89.283	3	0.85	Borings / well / auger	5000	Holocene
Hoque and Alam (1997)	Hoque (1982)* cites Morgan and McIntire (1959)****	Sundarbans	Sundarbans (Shekretak Ruins)	21.993	89.536	3	1.21	Borings / well / auger	5000	Holocene
Hoque and Alam (1997)	Hoque (1982)* cites Morgan and McIntire (1959)****	Sundarbans	Sundarbans (Shekretak Ruins)	21.993	89.536	3	1.39	Borings / well / auger	5000	Holocene
Hoque and Alam (1997)	Hoque (1982)* cites Morgan and McIntire (1959)****	Sundarbans	Sundarbans (Shekretak Ruins)	21.993	89.536	3	1.39	Borings / well / auger	5000	Holocene
Hoque and Alam (1997)	Hoque (1982)* cites Morgan and McIntire (1959)****	Sundarbans	Sundarbans (Shekretak Ruins)	21.993	89.536	3	2.13	Borings / well / auger	5000	Holocene
Hoque and Alam (1997)	Hoque (1982)*	Dominant irrigated croplands	Lower Deltaic Plain	22.463	90.568	5	0.25	No information, not defined or clear	No information, not defined or clear	No information, not defined or clear
Hoque and Alam (1997)	Hoque (1982)*	Dominant irrigated croplands	Lower Deltaic Plain	22.463	90.568	5	3.35	No information, not defined or clear	No information, not defined or clear	No information, not defined or clear
Hoque and Alam (1997)	Hoque (1982)* cites Morgan and McIntire (1959)**** cites Troiana (pers. comm.)	Dominant rainfed croplands, mosaic vegetation, mosaic croplands	Khulna (shipyard docks)	22.792	89.581	3	0.24	Borings / well / auger	5000	Holocene
Hoque and Alam (1997)	Hoque (1982)* cites Morgan and McIntire (1959)**** cites Troiana (pers. comm.)	Dominant rainfed croplands, mosaic vegetation, mosaic croplands	Khulna (shipyard docks)	22.792	89.581	3	1.1	Borings / well / auger	5000	Holocene
Hoque and Alam (1997)	Hoque (1982)* cites Morgan and McIntire (1959)**** cites Troiana (pers. comm.)	Dominant rainfed croplands, mosaic vegetation, mosaic croplands	Khulna (shipyard docks)	22.792	89.581	3	5.27	Borings / well / auger	5000	Holocene
Hoque and Alam (1997)	Hoque (1982)* cites Morgan and McIntire (1959)**** cites Troiana (pers. comm.)	Dominant rainfed croplands, mosaic vegetation, mosaic croplands	Khulna (shipyard docks)	22.792	89.581	3	5.48	Borings / well / auger	5000	Holocene
Hoque and Alam (1997)	Hoque (1982)* cites Morgan and McIntire (1959)**** cites Hunter (1875)***	Urban - Khulna	Khulna	22.817	89.544	4	1.09	Tank excavation	5000	Holocene
Hoque and Alam (1997)		Urban - Khulna	Khulna (coastal)	22.819	89.557	4	4	Carbon dating	No information, not defined or clear	Holocene
Hoque and Alam (1997)		Dominant irrigated croplands	Hizla Muladi	23.014	90.514	3	20	Borings / well / auger	10000	Holocene
Hoque and Alam (1997)	Hoque (1982)*	Dominant irrigated croplands	Dhaka Depression	23.238	90.546	5	1.82	Geomorphic survey	No information, not defined or clear	No information, not defined or clear
Hoque and Alam (1997)	Hoque (1982)*	Dominant irrigated croplands	Laimai Hills	23.445	91.128	5	-0.5	Neotectonics	No information, not defined or clear	No information, not defined or clear
Hoque and Alam (1997)	Hoque (1982)*	Dominant closed to open shrubland, broadleaved evergreen, mosaic vegetation (outside of maximum Holocene transgression shoreline)	Tippera Surface	23.631	91.669	5	-0.1	Neotectonics	No information, not defined or clear	No information, not defined or clear
Hoque and Alam (1997)	Hoque (1982)*	Dominant closed to open shrubland, broadleaved evergreen, mosaic vegetation (outside of maximum Holocene transgression shoreline)	Tippera Surface	23.631	91.669	5	-0.25	Neotectonics	No information, not defined or clear	No information, not defined or clear
Hoque and Alam (1997)	Hoque (1982)*	Dominant rainfed croplands, mosaic vegetation, mosaic croplands (outside of maximum Holocene transgression shoreline)	Madhupur Tract	24.387	90.461	5	-0.1	Neotectonics, geomorphic survey	No information, not defined or clear	No information, not defined or clear
Hoque and Alam (1997)	Hoque (1982)*	Dominant rainfed croplands, mosaic vegetation, mosaic croplands (outside of maximum Holocene transgression shoreline)	Madhupur Tract	24.387	90.461	5	-0.6	Neotectonics, geomorphic survey	No information, not defined or clear	No information, not defined or clear
Hoque and Alam (1997)	Hoque (1992)*	Dominant irrigated croplands	Sylhet Trough (central part)	24.47	91.188	5	21	Neotectonics, gravity survey, geomorphic survey	No information, not defined or clear	No information, not defined or clear
Hoque and Alam (1997)	Hoque (1982)*	Dominant irrigated croplands	Mymensingh Basin (Hinge Zone)	24.666	90.626	5	2.5	Gravity survey, geomorphic survey	No information, not defined or clear	No information, not defined or clear
Hoque and Alam (1997)	Hoque (1982)*	Dominant irrigated croplands	Mymensingh Basin (Hinge Zone)	24.666	90.626	5	1.5	Gravity survey, geomorphic survey	No information, not defined or clear	No information, not defined or clear
Hoque and Alam (1997)		Dominant irrigated croplands	Hazipur	24.72	89.75	4	24.4	Borings / well / auger	10000	Holocene
Hoque and Alam (1997)	Hoque (1982)*	Dominant irrigated croplands	Barind Track	24.836	89.571	5	-0.4	Neotectonics, geomorphic survey	No information, not defined or clear	No information, not defined or clear
Hoque and Alam (1997)	Hoque (1982)*	Dominant irrigated croplands	Barind Track	24.836	89.571	5	-1.1	Neotectonics, geomorphic survey	No information, not defined or clear	No information, not defined or clear
Hoque and Alam (1997)	Umitsu (1985)****	Dominant rainfed croplands, mosaic vegetation, mosaic croplands (outside of maximum Holocene transgression shoreline)	Kanaigaht, Sylhet District	25.01	92.26	2	2	Carbon dating	4180±120	Holocene
Hoque and Alam (1997); Islam et al. (1999)	Umitsu (1993)****** cites Umitsu (1985)***	Dominant irrigated croplands	Sirajganj, Rajshahi District	24.45	89.716	2	3.95	Carbon dating	28320±1585	Pleistocene
Hoque and Alam (1997); Stanley and Hait (2000)	Umitsu (1993)***** cites Umitsu (1987)*	Urban - Khulna	Daulatpur, Khulna District	22.887	89.516	3	1.547	Carbon dating	3230±110	Holocene
Hoque and Alam (1997); Stanley and Hait (2000)	Umitsu (1993)***** cites Umitsu (1987)*	Urban - Khulna	Daulatpur, Khulna District	22.887	89.516	3	1.889	Carbon dating	6880±130	Holocene
Hoque and Alam (1997); Stanley and Hait (2000)	Umitsu (1993)***** cites Umitsu (1987)*	Urban - Khulna	Daulatpur, Khulna District	22.887	89.516	3	2.465	Carbon dating	6490±100	Holocene
Hoque and Alam (1997); Stanley and Hait (2000)	Umitsu (1993)*****	Urban - Khulna	Daulatpur, Khulna District	22.887	89.516	3	2.833	Carbon dating	7060±120	Holocene
Hoque and Alam (1997); Stanley and Hait (2000)	Umitsu (1993)***** cites Umitsu (1987)*	Urban - Khulna	Daulatpur, Khulna District	22.887	89.516	3	2.944	Carbon dating	10190±210	Holocene
Hoque and Alam (1997); Stanley and Hait (2000)	Umitsu (1993)***** cites Umitsu (1987)*	Urban - Khulna	Daulatpur, Khulna District	22.887	89.516	3	3.534	Carbon dating	7640±100	Holocene
Hoque and Alam (1997); Stanley and Hait (2000)	Umitsu (1993)***** cites Umitsu (1987)*	Urban - Khulna	Daulatpur, Khulna District	22.887	89.516	3	3.824	Carbon dating	8890±150	Holocene
Hoque and Alam (1997); Stanley and Hait (2000)	Umitsu (1993)***** cites Umitsu (1987)*	Urban - Khulna	Daulatpur, Khulna District	22.887	89.516	3	3.896	Carbon dating	12320±240	Pleistocene
Hoque and Alam (1997); Stanley and Hait (2000)	Umitsu (1993)*****	Urban - Khulna	Daulatpur, Khulna District	22.887	89.516	3	3.928	Carbon dating	8910±150	Holocene
Johnson and Alam (1991)		Dominant irrigated croplands	Sylhet Trough	24.746	91.856	5	1.2	Neotectonics	Up to 5 million	Pliocene and Pleistocene
Khan and Islam (2008)	Khan and Kudrass, 1999*	Dominant rainfed croplands, mosaic vegetation, mosaic croplands	Satkhira-Khulna (north)	22.8431	89.032	4	1	No information, not defined or clear	No information, not defined or clear	No information, not defined or clear
Khan and Islam (2008)	Khan and Kudrass, 1999*	Dominant rainfed croplands, mosaic vegetation, mosaic croplands	Satkhira-Khulna (north)	22.8431	89.032	4	3	No information, not defined or clear	No information, not defined or clear	No information, not defined or clear
Khan and Islam (2008)	Khan and Kudrass, 1999*	Dominant rainfed croplands, mosaic vegetation, mosaic croplands	Satkhira-Khulna (central)	22.5593	89.032	4	3	No information, not defined or clear	No information, not defined or clear	No information, not defined or clear
Khan and Islam (2008)	Khan and Kudrass, 1999*	Dominant rainfed croplands, mosaic vegetation, mosaic croplands	Satkhira-Khulna (central)	22.5593	89.032	4	5	No information, not defined or clear	No information, not defined or clear	No information, not defined or clear
Khan and Islam (2008)	Khan and Kudrass, 1999*	Sundarbans	Satkhira-Khulna (south)	22.046	89.032	4	5	No information, not defined or clear	No information, not defined or clear	No information, not defined or clear
Khan and Islam (2008)	Khan and Kudrass, 1999*	Sundarbans	Satkhira-Khulna (south)	22.046	89.032	4	6	No information, not defined or clear	No information, not defined or clear	No information, not defined or clear
Khan and Islam (2008)	Khan and Kudrass, 1999*	Dominant rainfed croplands, mosaic vegetation, mosaic croplands	Satkhira-Khulna-Bagerhat	22.5897	89.604	4	1	No information, not defined or clear	No information, not defined or clear	No information, not defined or clear
Khan and Islam (2008)		Dominant irrigated croplands	Sylet Basin	24.746	91.856	5	4	No information, not defined or clear	No information, not defined or clear	No information, not defined or clear
Khan and Islam (2008)		Dominant irrigated croplands	Sylet Basin	24.746	91.856	5	6	No information, not defined or clear	No information, not defined or clear	No information, not defined or clear
Morgan and McIntire (1959)		Dominant irrigated croplands	Sylhet Basin	24.746	91.856	5	41	Geomorphic survey	No information, not defined or clear	No information, not defined or clear
Morgan and McIntire (1959)		Dominant irrigated croplands	Sylhet Basin	24.746	91.856	5	30	Geomorphic survey	No information, not defined or clear	No information, not defined or clear
Pethick and Orford (2013)	Syvitski et al. (2009)****, Stanley and Hait (2000)*****, Steckler et al. (2008b)*****, Steckler et al. (pers. comm.)*, Hanebuth et al. (2013).	Sundarbans	Hiron Point	21.8132	89.4598	4	5	Carbon dating (with optical stimulated luminescene), GPS	No information, not defined or clear	No information, not defined or clear
Pethick and Orford (2013)	Syvitski et al. (2009)****, Stanley and Hait (2000)*****, Steckler et al. (2008b)*****, Steckler et al. (pers. comm.)*, Hanebuth et al. (2013).	Sundarbans	Mongla	22.294	89.36	4	6	Carbon dating (with optical stimulated luminescene), GPS	No information, not defined or clear	No information, not defined or clear
Pethick and Orford (2013)	Syvitski et al. (2009)****, Stanley and Hait (2000)*****, Steckler et al. (2008b)*****, Steckler et al. (pers. comm.)*, Hanebuth et al. (2013).	Urban - Khulna	Khulna	22.819	89.557	4	7	Carbon dating (with optical stimulated luminescene), GPS	No information, not defined or clear	No information, not defined or clear
Sahu and Sikdar (2011)	Sidkar et al.(1996)*	Urban - Kolkata	Garia area, Kolkata	22.4629	88.3967	2	10.6	Groundwater levels	36 (1957-1993)	Recent
Sahu and Sikdar (2011)	Sidkar et al.(1996)*	Urban - Kolkata	Jadavpur-Babubagan, Kolkata	22.5079	88.3685	2	10.6	Groundwater levels	36 (1957-1993)	Recent
Sahu and Sikdar (2011)	Sidkar et al.(1996)*	Urban - Kolkata	Bagbazar, Kolkata	22.6026	88.3659	2	8.3	Groundwater levels	35 (1958-1993)	Recent
Sahu and Sikdar (2011)	Sidkar et al.(1996)*	Urban - Kolkata	Tangra, Kolkata	22.5626	88.378	2	12.2	Groundwater levels	37 (1956-1993)	Recent
Sahu and Sikdar (2011)	Sidkar et al.(1996)*	Urban - Kolkata	Maniktala, Kolkata	22.6026	88.3659	2	10.5	Groundwater levels	37 (1956-1993)	Recent
Sahu and Sikdar (2011)	Sidkar et al.(1996)*	Urban - Kolkata	Beleghata, Kolkata	22.5675	88.3807	2	12.2	Groundwater levels	37 (1956-1993)	Recent
Sahu and Sikdar (2011)	Sidkar et al.(1996)*	Urban - Kolkata	Kasba, Kolkata	22.4918	88.3919	2	8.2	Groundwater levels	36 (1958-1994)	Recent
Sahu and Sikdar (2011)	Various**	Dominant rainfed croplands, mosaic vegetation, mosaic croplands	Pratap Nagar, Bhangar-I	22.4221	88.3548	3	1.12	Groundwater levels	4 (2001-2005)	Recent
Sahu and Sikdar (2011)	Various**	Dominant rainfed croplands, mosaic vegetation, mosaic croplands	Salt Lake Sector III, Kolkata	22.5667	88.4667	2	2.69	Groundwater levels	23 (1981-2004)	Recent
Sahu and Sikdar (2011)	Various**	Urban - Kolkata	Santoshpur-Garfa	22.4918	88.3919	2	12.01	Groundwater levels	24 (1981-2005)	Recent
Sahu and Sikdar (2011)	Various**	Dominant rainfed croplands, mosaic vegetation, mosaic croplands	Salt Lake, Kolkata	22.5667	88.4667	2	16.4	Groundwater levels	3 (2001-2004)	Recent
Sahu and Sikdar (2011)	Various**	Urban - Kolkata	Bagbazar, Kolkata	22.6026	88.3659	2	5.93	Groundwater levels	4 (2001-2005)	Recent
Sahu and Sikdar (2011)	Various**	Urban - Kolkata	Jadavpur-Babubagan, Kolkata	22.5079	88.3685	2	6.55	Groundwater levels	11 (1994-2005)	Recent
Sahu and Sikdar (2011)	Various**	Urban - Kolkata	Tiljala - Picnic Garden, Kolkata	22.5176	88.3841	2	14.7	Groundwater levels	4 (2001-2005)	Recent
Sahu and Sikdar (2011)	Various**	Dominant rainfed croplands, mosaic vegetation, mosaic croplands	Bantala	22.5244	88.4392	3	31.7	Groundwater levels	4 (2001-2005)	Recent
Sahu and Sikdar (2011)	Various**	Urban - Kolkata	Rajarhat-Salangari, Kolkata	22.5013	88.3206	3	43.8	Groundwater levels	4 (2001-2005)	Recent
Sahu and Sikdar (2011)	Various**	Urban - Kolkata	Kashipur-Dakshin, Kolkata	22.6148	88.3761	2	10.05	Groundwater levels	4 (2001-2005)	Recent
Sahu and Sikdar (2011)	Various**	Urban - Kolkata	Nayabad, Sonarpur, Kolkata	22.6148	88.3761	2	23.6	Groundwater levels	4 (2001-2005)	Recent
Sahu and Sikdar (2011)	Various**	Urban - Kolkata	Tiljala-Tangra, Kolkata	22.5176	88.3841	2	7.8	Groundwater levels	4 (2001-2005)	Recent
Sahu and Sikdar (2011)	Various**	Urban - Kolkata	Ultadanga-Maniktala-Narkeldanga, Kolkata	22.6026	88.3659	2	5.09	Groundwater levels	49 (1956-2005)	Recent
Sahu and Sikdar (2011)	Various**	Urban - Kolkata	Beleghata, Kolkata	22.5675	88.3807	2	5.94	Groundwater levels	49 (1956-2005)	Recent
Sahu and Sikdar (2011)	Various**	Urban - Kolkata	Gobra-Tiljala, Kolkata	22.5176	88.3841	2	22.3	Groundwater levels	49 (1956-2005)	Recent
Sahu and Sikdar (2011)	Various**	Urban - Kolkata	Kasba, Kolkata	22.4918	88.3919	2	6.8	Groundwater levels	49 (1958-2005)	Recent
Sahu and Sikdar (2011); Bhattacharya et al. (2004)	Sidkar et al. (1996)*, Bhattacharya et al. (2004)**** cites Sidkar et al. (1996)*	Urban - Kolkata	Tiljala-Gobra, Kolkata	22.5176	88.3841	2	13.78	Groundwater levels	37 (1956-1993)	Recent
Sarker et al. (2012)		Urban - Khulna	Khulna	22.817	89.544	1	10	GPS	No information, not defined or clear	Recent
Sarker et al. (2012)		Dominant irrigated croplands	Patuakhali	22.358	90.334	1	10	GPS	No information, not defined or clear	Recent
Sarker et al. (2012)		Dominant irrigated croplands	Doyamayee Kali Mondir	22.252	90.472	1	1.25	Archaeological	806	Recent
Sarker et al. (2012)		Dominant rainfed croplands, mosaic vegetation, mosaic croplands	Chunakhola Mosque	22.67	89.746	1	1.3	Archaeological	500	Recent
Sarker et al. (2012)		Dominant rainfed croplands, mosaic vegetation, mosaic croplands	Chunakhola Mosque	22.67	89.746	1	2.5	Archaeological	500	Recent
Sarker et al. (2012)		Dominant rainfed croplands, mosaic vegetation, mosaic croplands	Bibi Beguni Mosque	22.67	89.746	1	1.3	Archaeological	500	Recent
Sarker et al. (2012)		Dominant rainfed croplands, mosaic vegetation, mosaic croplands	Bibi Beguni Mosque	22.67	89.746	1	2.5	Archaeological	500	Recent
Sarker et al. (2012)		Sundarbans	Shakher Temple	22.222	89.486	1	2.5	Archaeological	400	Recent
Sarker et al. (2012)		Sundarbans	Shakher Temple	22.222	89.486	1	6.5	Archaeological	400	Recent
Stanley and Hait (2000)		Dominant rainfed croplands, mosaic vegetation, mosaic croplands	Bakkhali	21.5626	88.3068	1	1.779	Carbon dating	4710±120	Holocene
Stanley and Hait (2000)		Dominant rainfed croplands, mosaic vegetation, mosaic croplands	Bakkhali	21.5626	88.3068	1	2.547	Carbon dating	4790±30	Holocene
Stanley and Hait (2000)		Dominant rainfed croplands, mosaic vegetation, mosaic croplands	Bakkhali	21.5626	88.3068	1	3.874	Carbon dating	6040±35	Holocene
Stanley and Hait (2000)		Dominant rainfed croplands, mosaic vegetation, mosaic croplands	Bakkhali	21.5626	88.3068	1	4.991	Carbon dating	5690±35	Holocene
Stanley and Hait (2000)		Dominant rainfed croplands, mosaic vegetation, mosaic croplands	Bakkhali	21.5626	88.3068	1	6.65	Carbon dating	6165±90	Holocene
Stanley and Hait (2000)		Dominant rainfed croplands, mosaic vegetation, mosaic croplands	Sagar Island	21.6522	88.0847	1	0.812	Carbon dating	52000±1110	Pleistocene
Stanley and Hait (2000)		Dominant rainfed croplands, mosaic vegetation, mosaic croplands	Sagar Island	21.6522	88.0847	1	0.979	Carbon dating	24160±520	Pleistocene
Stanley and Hait (2000)		Dominant rainfed croplands, mosaic vegetation, mosaic croplands	Sagar Island	21.6522	88.0847	1	1.128	Carbon dating	42300±1110	Pleistocene
Stanley and Hait (2000)		Dominant rainfed croplands, mosaic vegetation, mosaic croplands	Sagar Island	21.6522	88.0847	1	1.254	Carbon dating	38900±240	Pleistocene
Stanley and Hait (2000)		Sundarbans	Pakhiralaya, near Kakdwip	21.925	88.8081	1	1.153	Carbon dating	4250±40	Holocene
Stanley and Hait (2000)		Sundarbans	Pakhiralaya, near Kakdwip	21.925	88.8081	1	2.961	Carbon dating	7530±100	Holocene
Stanley and Hait (2000)		Dominant rainfed croplands, mosaic vegetation, mosaic croplands	Bishalakshmipur	21.9328	88.2494	1	3.562	Carbon dating	7650±35	Holocene
Stanley and Hait (2000)		Dominant rainfed croplands, mosaic vegetation, mosaic croplands	Bishalakshmipur	21.9328	88.2494	1	4.256	Carbon dating	7460±35	Holocene
Stanley and Hait (2000)		Dominant rainfed croplands, mosaic vegetation, mosaic croplands	Bishalakshmipur	21.9328	88.2494	1	4.57	Carbon dating	7790±50	Holocene
Stanley and Hait (2000)		Sundarbans	Pakhiralaya, near Kakdwip	21.925	88.8081	1	5.006	Carbon dating	8250±60	Holocene
Stanley and Hait (2000)		Sundarbans	Pakhiralaya, near Kakdwip	21.925	88.8081	1	5.659	Carbon dating	8800±135	Holocene
Stanley and Hait (2000)		Dominant rainfed croplands, mosaic vegetation, mosaic croplands	Bishalakshmipur	21.9328	88.2494	1	7.111	Carbon dating	450±25	Recent
Stanley and Hait (2000)		Dominant rainfed croplands, mosaic vegetation, mosaic croplands	Raidighi	22	88.4372	1	2.495	Carbon dating	9420±235	Holocene
Stanley and Hait (2000)		Dominant rainfed croplands, mosaic vegetation, mosaic croplands	Raidighi	22	88.4372	1	2.94	Carbon dating	7960±170	Holocene
Stanley and Hait (2000)		Dominant rainfed croplands, mosaic vegetation, mosaic croplands	Raidighi	22	88.4372	1	2.993	Carbon dating	7560±50	Holocene
Stanley and Hait (2000)		Dominant rainfed croplands, mosaic vegetation, mosaic croplands	Raidighi	22	88.4372	1	3.634	Carbon dating	7430±45	Holocene
Stanley and Hait (2000)		Dominant rainfed croplands, mosaic vegetation, mosaic croplands	Diamond Habour	22.2167	88.1667	1	1.936	Carbon dating	14460±350 or 320	Pleistocene
Stanley and Hait (2000)		Dominant rainfed croplands, mosaic vegetation, mosaic croplands	Diamond Habour	22.2167	88.1667	1	2.169	Carbon dating	7030±30	Holocene
Stanley and Hait (2000)		Dominant rainfed croplands, mosaic vegetation, mosaic croplands	Canning	22.314	88.671	1	5.069	Carbon dating	6250±140	Holocene
Stanley and Hait (2000)		Dominant rainfed croplands, mosaic vegetation, mosaic croplands	Salt Lake	22.5667	88.4667	1	0.545	Carbon dating	24200±580	Pleistocene
Stanley and Hait (2000)		Dominant rainfed croplands, mosaic vegetation, mosaic croplands	Salt Lake	22.5667	88.4667	1	1.254	Carbon dating	3390±70	Holocene
Stanley and Hait (2000)		Dominant rainfed croplands, mosaic vegetation, mosaic croplands	Salt Lake	22.5667	88.4667	1	4.106	Carbon dating	3860±30	Holocene
Stanley and Hait (2000)		Dominant rainfed croplands, mosaic vegetation, mosaic croplands	Dankuni	22.6827	88.2888	1	0.978	Carbon dating	4500±35	Holocene
Stanley and Hait (2000)		Dominant rainfed croplands, mosaic vegetation, mosaic croplands	Dankuni	22.6827	88.2888	1	1.26036	Carbon dating	3060±140	Holocene
Steckler et al. (2008b)		Dominant irrigated croplands	Sylhet Basin	24.746	91.856	1	15	GPS	3 (2003-2006)	Recent
Steckler et al. (2010)		Urban - Dhaka	Dhaka	23.7267	90.4013	1	10.8	GPS	4 (2003-2007	Recent
Steckler et al. (2010)		Urban - Dhaka	Dhaka	23.7267	90.4013	1	9	GPS	4 (2003-2007	Recent
Steckler et al. (2010)		Urban - Dhaka	Dhaka	23.7267	90.4013	1	2	GPS	4 (2003-2007	Recent
Steckler et al. (2010)		Dominant irrigated croplands	Sylhet Basin	24.746	91.856	1	12.81	GPS	4 (2003-2007	Recent
Warrick et al. (1996)	Col Burrard (1933)*	Urban - Kolkata	Kolkata (plains surrounding)	22.572	88.363	4	3.3	No information, not defined or clear	No information, not defined or clear	No information, not defined or clear
Warrick et al. (1996)	MPO (1986)*	Dominant closed to open shrubland, broadleaved evergreen, mosaic vegetation (outside of maximum Holocene transgression shoreline)	Shillong Plateau	25.601	91.505	5	-0.37	No information, not defined or clear	67 (1910-1977)	Recent
Worm (1998)		Dominant irrigated croplands	Sylet Basin	24.746	91.856	5	1.2	Neotectonics, magnetostratigraphic dating	Up to 5 million	Up to Pliocene
